# Supplementary material
Source: publisher figshare collection journal article supplement (https://tandf.figshare.com/ndownloader/files/15577259)
Supplement: Supplementary file 1 [file 15577259]

## Sheet: Sheet1
Supplementary Table 5
Whole-rock Sr-Nd isotopic data of the Shouwangfen complex.
Sample	87Rb/86Sr	87Sr/86Sr	2σ, 10-6	147Sm/144Nd	143Nd/144Nd	2σ, 10-6	(87Sr/86Sr)i	(143Nd/144Nd)i	εNd (t)	T2DM(Ga)
Quartz monzonite (QM)
16BZ74	0.384769	0.706338	8	0.092263	0.511863	3	0.705638	0.511863	-15.1	1.61
16BZ76	0.534742	0.706575	7	0.09216	0.51186	4	0.705602	0.51186	-15.2	1.62
Quartz diorite (QD)
18NG14	0.266659	0.706118	8	0.09827	0.512219	4	0.705633	0.512219	-8.2	1.23
18FJ10	0.456184	0.706169	10	0.103445	0.512319	5	0.705339	0.512319	-6.2	1.15
18PJ25	0.306633	0.705753	10	0.104493	0.512272	4	0.705195	0.512272	-7.1	1.23
Mafic microgranular enclaves (MMEs)
18XB09	0.227525	0.705478	8	0.102803	0.512325	4	0.705064	0.512325	-6.1	1.13
18CL27	0.1683	0.706222	10	0.102447	0.511961	5	0.705916	0.511961	-13.2	1.63
18CL29	0.16332	0.705898	8	0.103201	0.512054	4	0.705601	0.512054	-11.4	1.51
